# Supplementary material
Source: HighWire-hosted journal article supplement (https://erj.ersjournals.com/content/53/1/1800612)
Supplement: inline-supplementary-material-2 [file inline-supplementary-material-2.pdf]

**Table S1: Associations of Temperature at Home Address and FEV<sub>1</sub> by Asthma and COPD**

| Temperature Average | Unit | Difference in FEV <sub>1</sub> , mL (95% CI) |                              |                      |                           |
|---------------------|------|----------------------------------------------|------------------------------|----------------------|---------------------------|
|                     |      | Asthma<br>(n= 2,112 obs)                     | No Asthma<br>(n= 7, 038 obs) | COPD<br>(n= 426 obs) | No COPD<br>(n= 8,724 obs) |
| 1-Day               | 5 °C | -16.2 (-28.9, -3.5)                          | -16.9 (-27.1, -6.7)          | -30.3 (-52.8, -7.8)  | -15.9 (-25.8, -6.0)       |
| 2-Day               | 5 °C | -15.7 (-29.4, -1.9)                          | -15.0 (-26.4, -3.7)          | -28.7 (-52.4, -5.1)  | -14.3 (-25.4, -3.2)       |
| 7-Day               | 5 °C | -21.1 (-37.5, -4.8)                          | -19.5 (-33.4, -5.5)          | -27.0 (-53.7, -0.3)  | -19.5 (-33.2, -5.7)       |

Associations (95% CI) are from linear mixed models with an interaction term for asthma or COPD, adjusted for participant sex, age, age<sup>2</sup>, height, weight, smoking status, packyears, household smoking, asthma, COPD (in models with interaction term for COPD), education, census tract median household income, season (as sine and cosine terms of the date), prior-day regional relative humidity and PM<sub>2.5</sub> level, exam 8, cohort. The p value for the interaction term was >0.1 for all 6 models.
